# Supplementary material
Source: publisher site journal article supplement (https://www.dovepress.com/article/465423)

**Additional resources**

**Appendix 1**

**
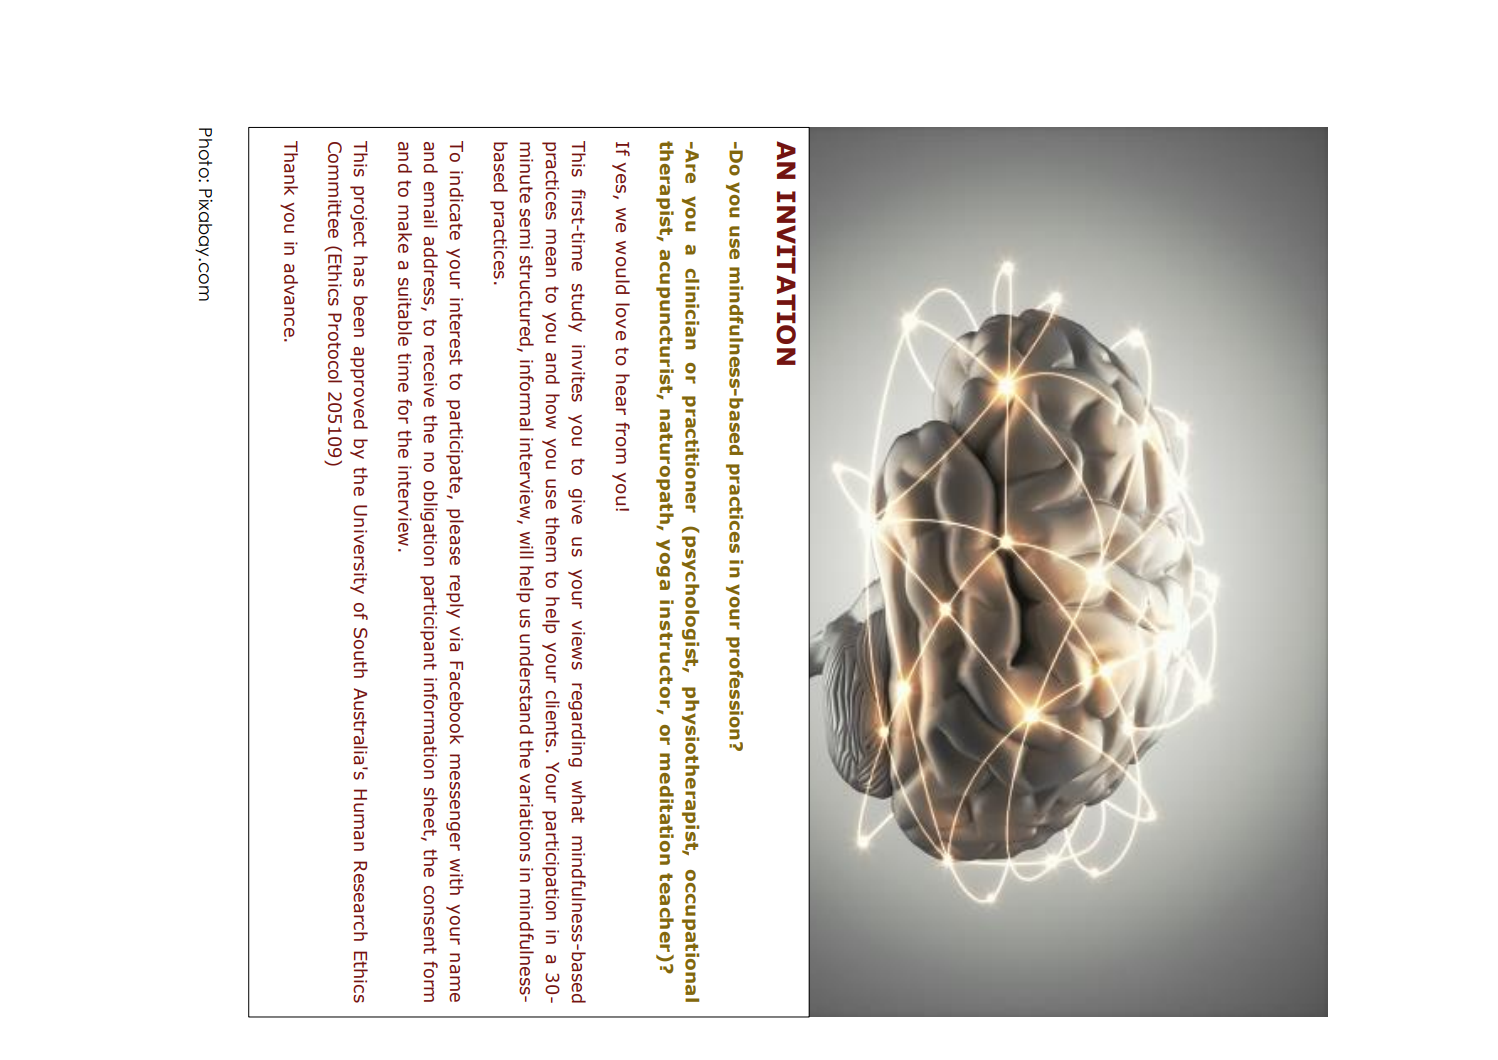
**

**Appendix 2**

**
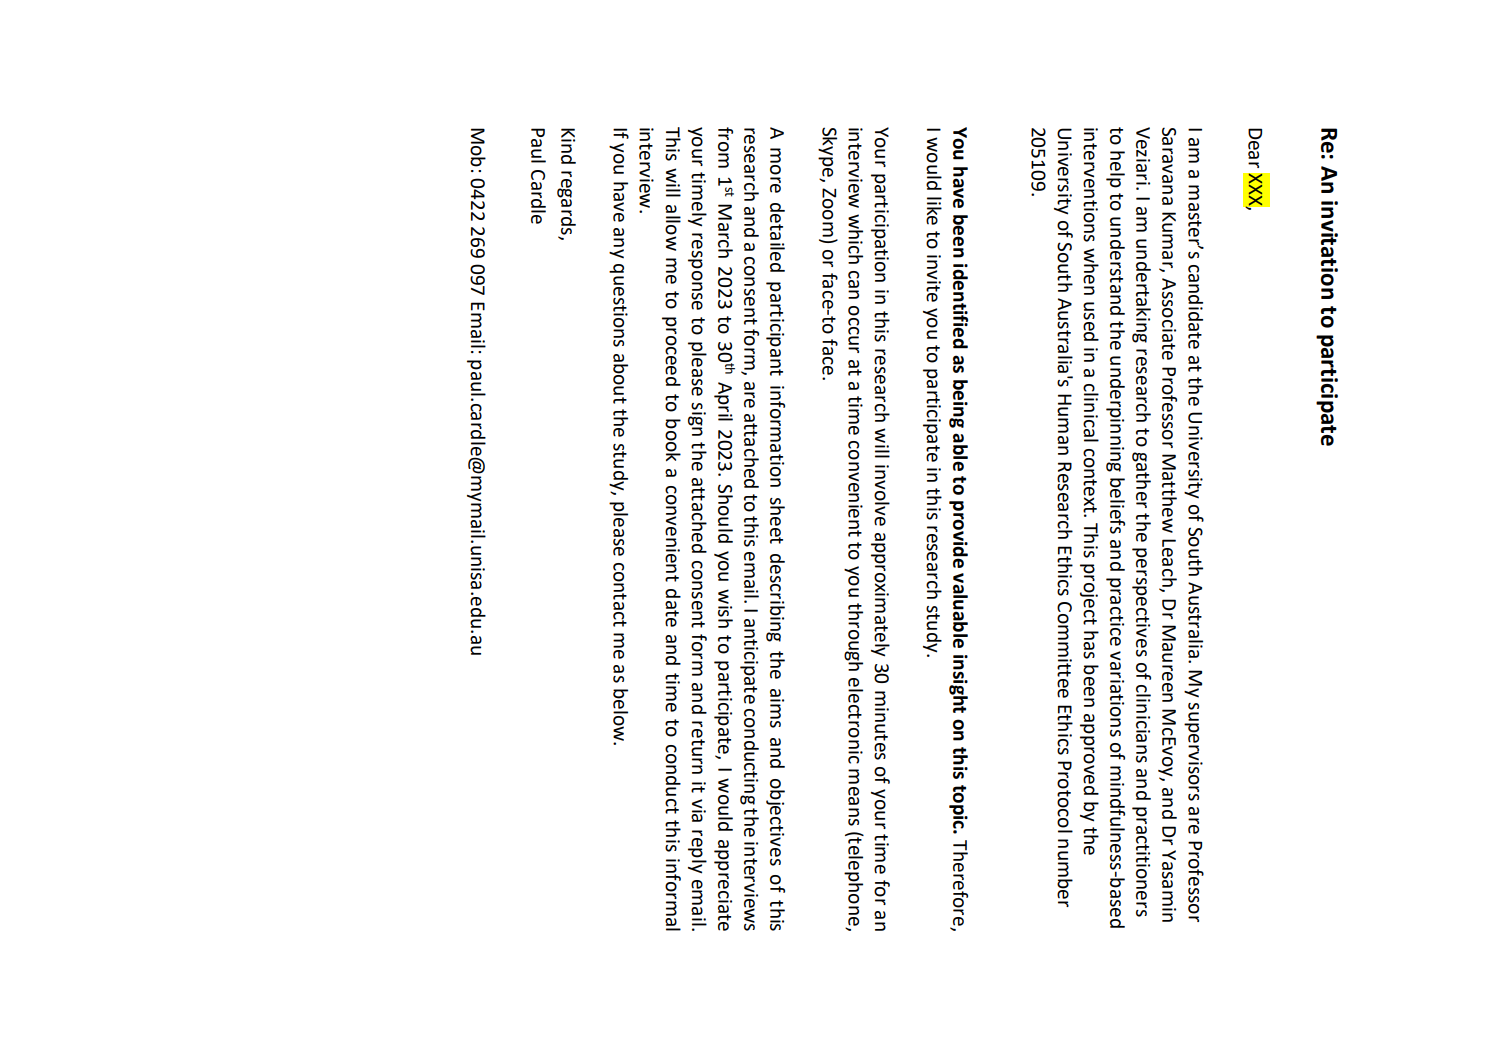
**

**Appendix 3**
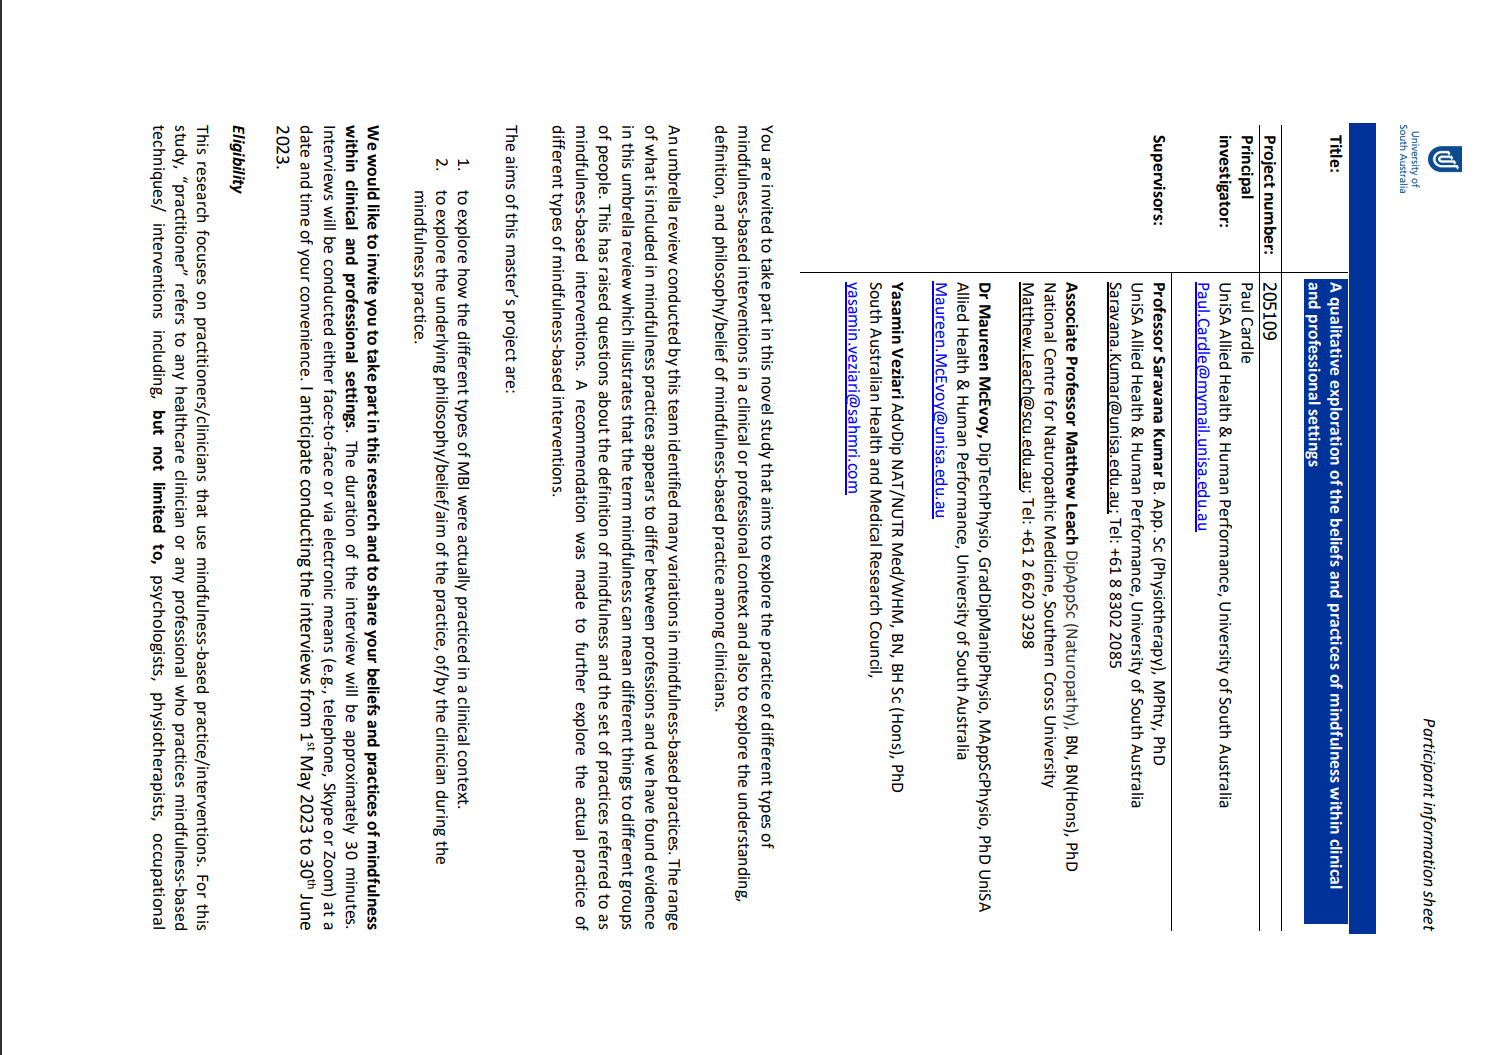

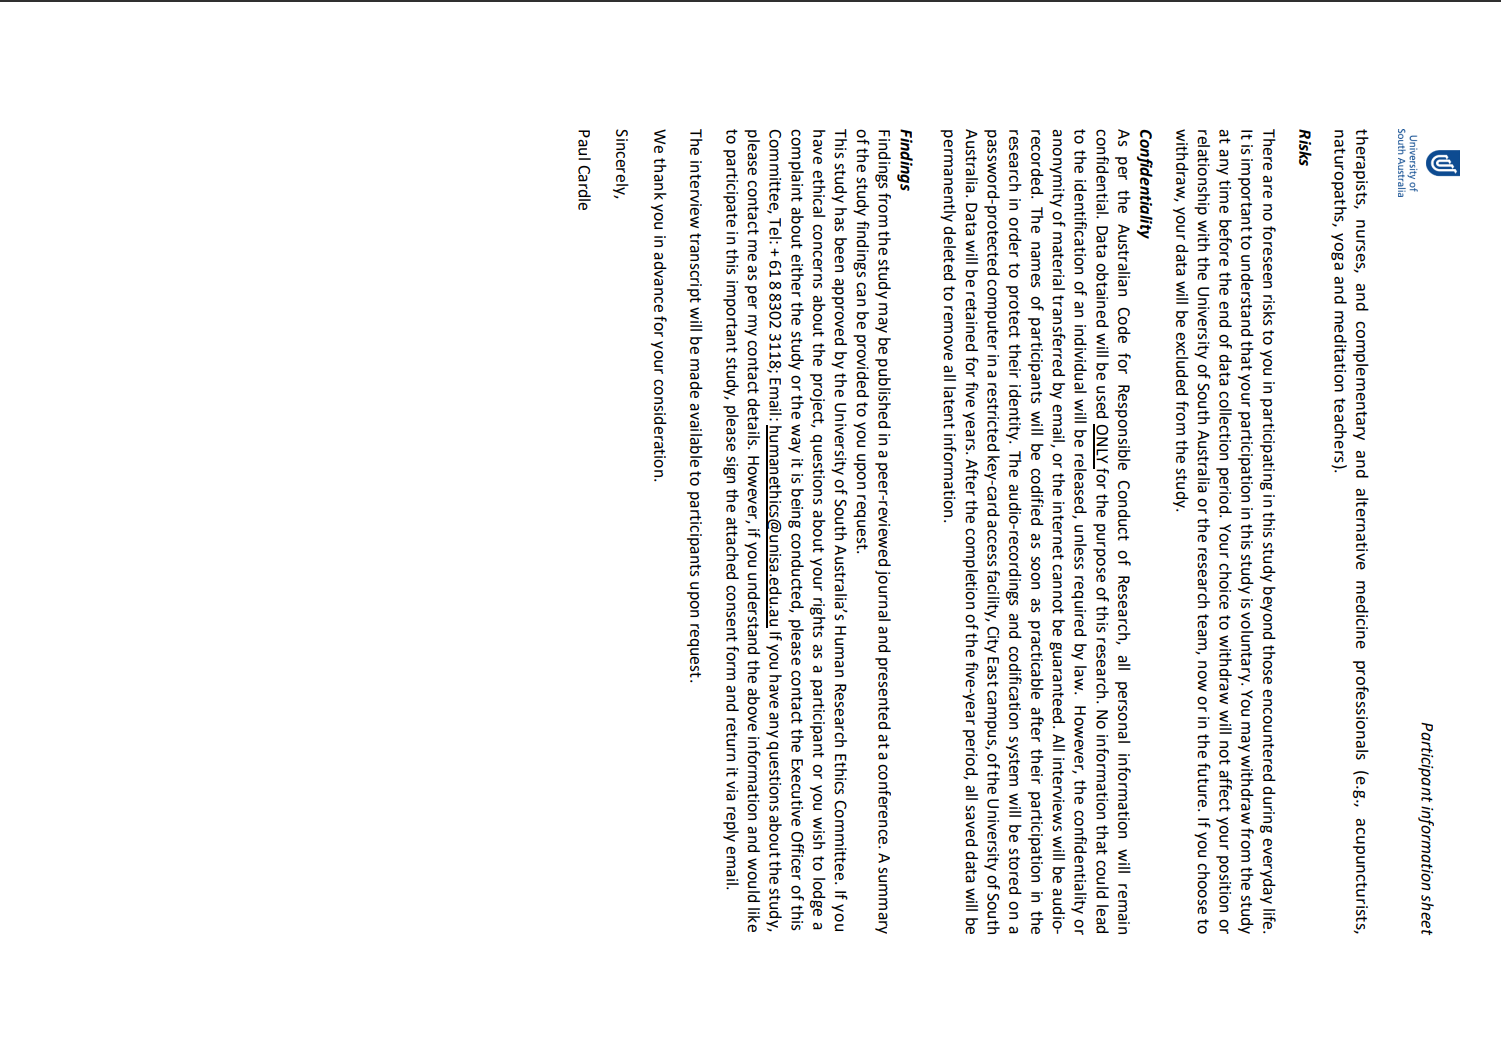


**Appendix 4
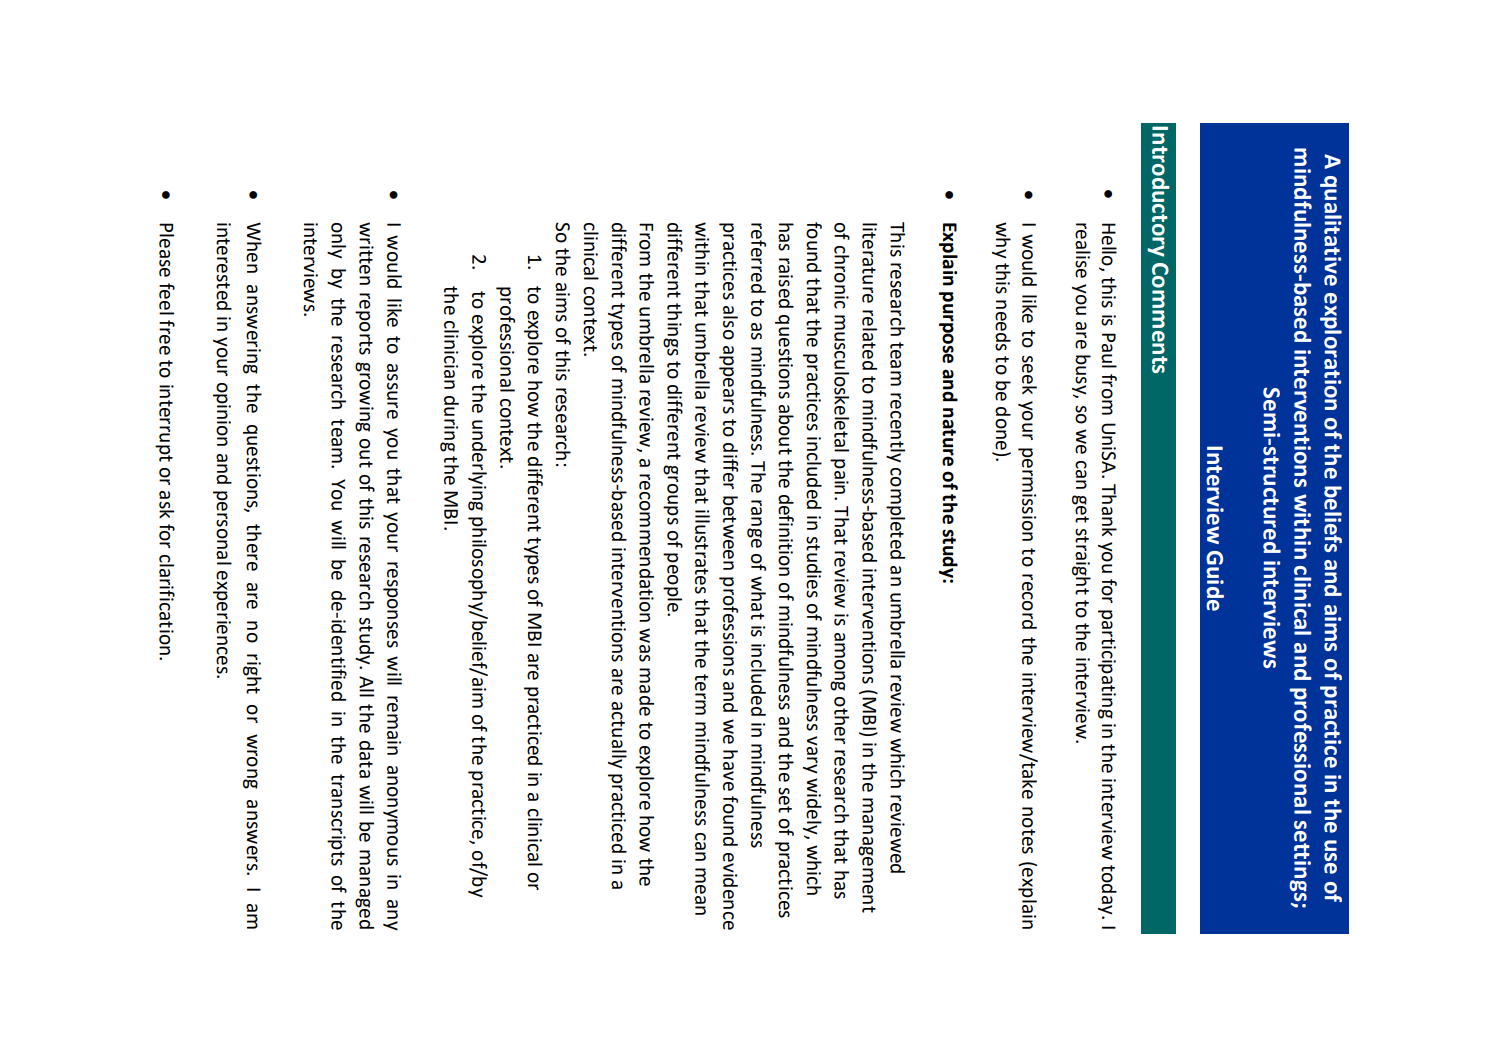

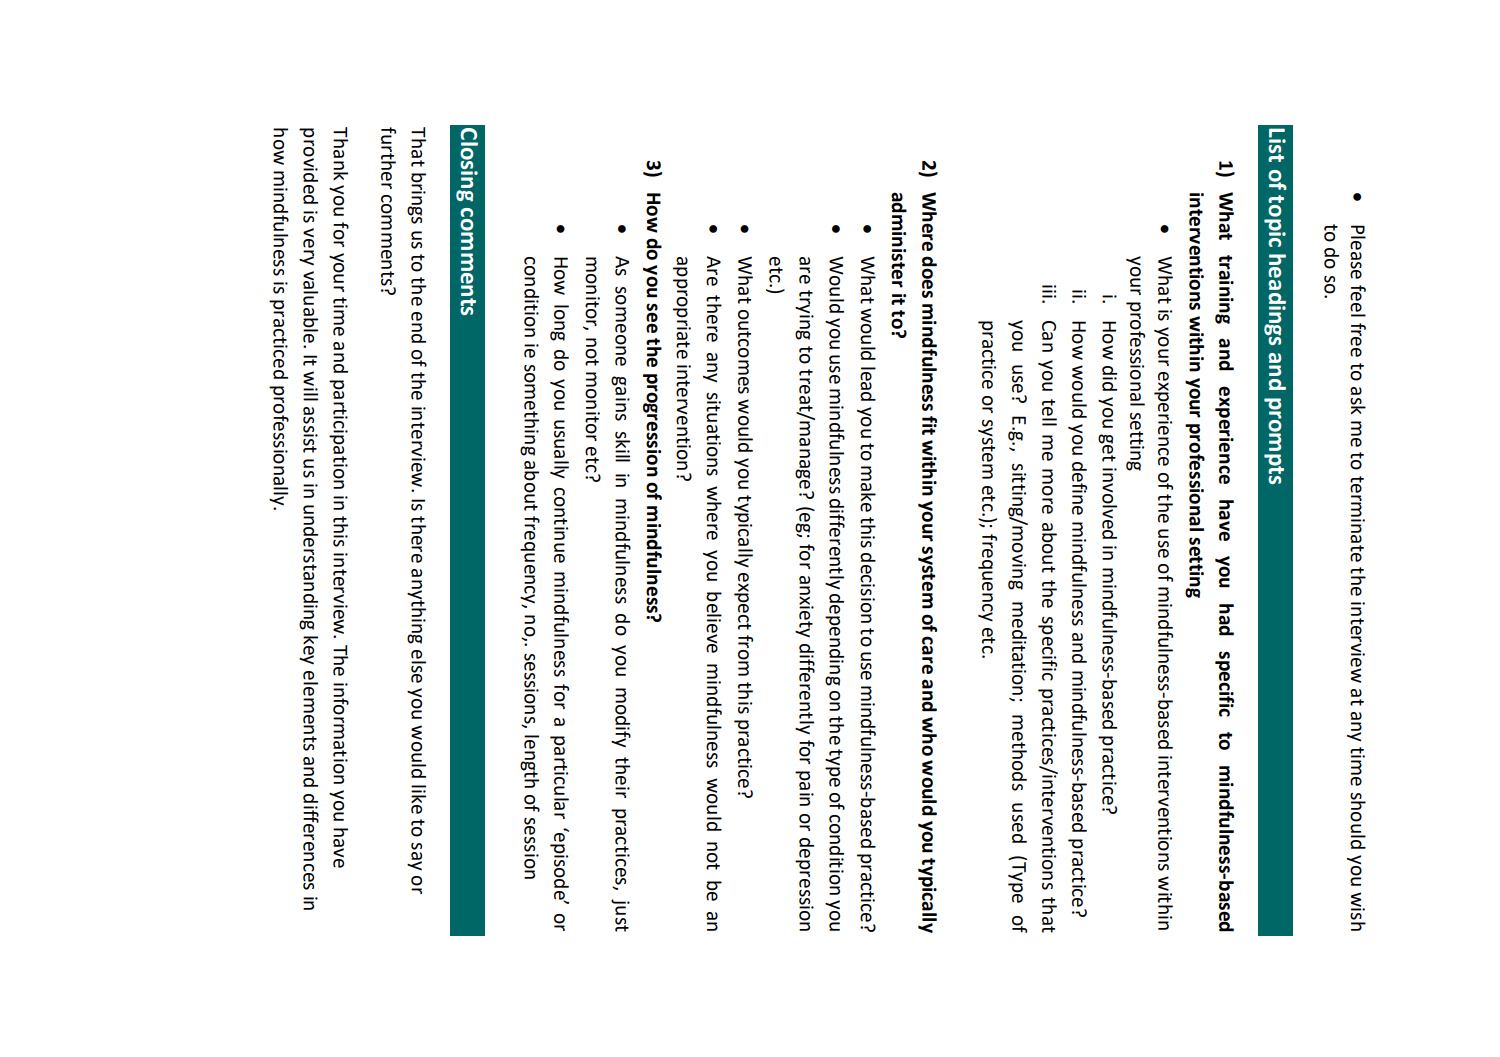
**

**Appendix 5
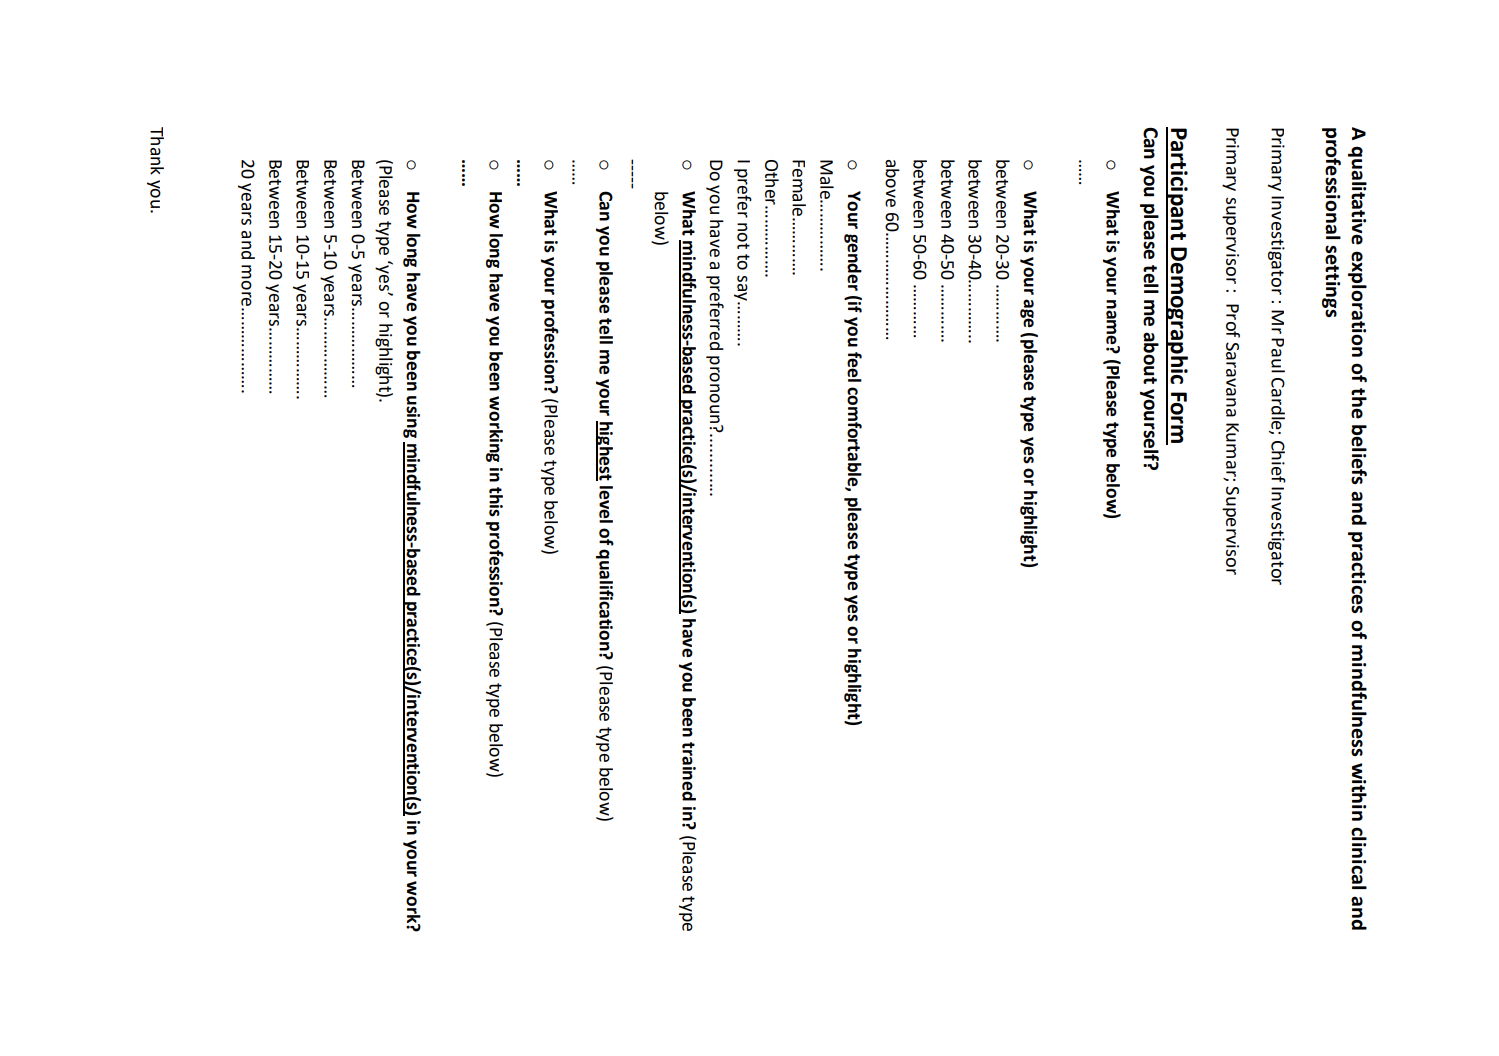
**

Supplement: Supplementary file 1 [file get_supplementary_file.php]
